# Supplementary material for: A multifunctional plasmonic chip for bacteria capture, imaging, detection, and in situ elimination for wound therapy
Source: Royal Society of Chemistry journal article supplement (doi:10.1039/d0nr00638f), 2020-01-01
Supplement: d0nr00638f1.pdf [file d0nr00638f1.pdf]

## Electronic Supplementary Information

### **A multifunctional plasmonic chip for bacteria capture, imaging, detection, and in-situ elimination for wound therapy**

Xia Gao <sup>a</sup>, Haotian Wu <sup>a</sup>, Zhe Hao <sup>a</sup>, Xiangyi Ji <sup>a</sup>, Xiaodong Lin <sup>a</sup>, Shuo Wang<sup>\*c</sup>, and Yaqing Liu<sup>\*ab</sup>

<sup>a</sup> State Key Laboratory of Food Nutrition and Safety, College of Food Science and Engineering, Tianjin University of Science and Technology, Tianjin 300457, China

<sup>b</sup> Beijing Advanced Innovation Center for Food Nutrition and Human Health, Beijing Technology and Business University, Beijing 100048, China

<sup>c</sup> Tianjin Key Laboratory of Food Science and Health, School of Medicine, Nankai University, Tianjin 300071, China

\* Corresponding authors: E-mail: yaqingliu@tust.edu.cn, s.wang@tust.edu.cn.

## Supplementary Table and Figures

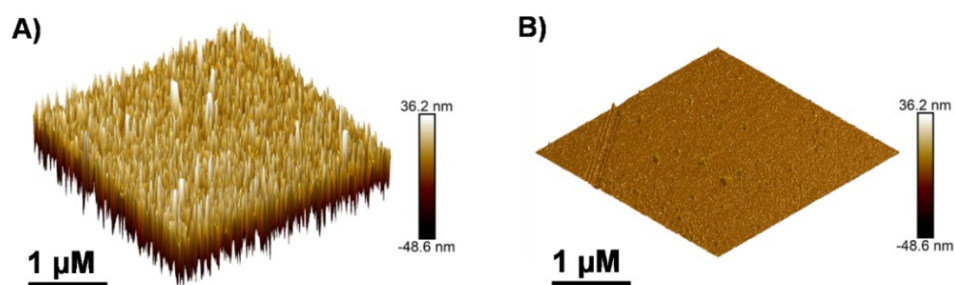

Figure S1. 3D AFM images of the pAu (A) and the glass slide (B) from the side view.

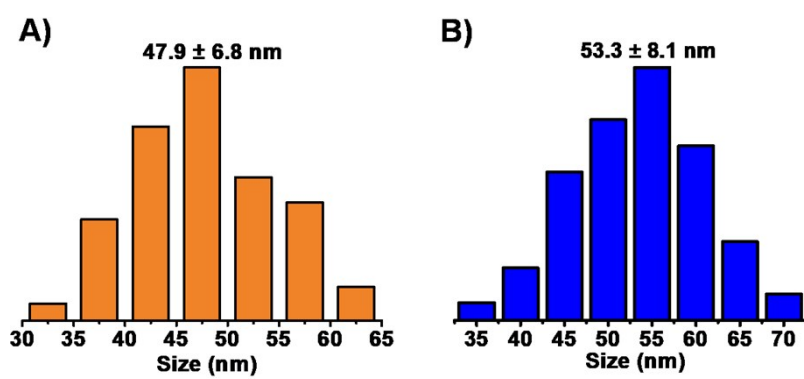

Figure S2. The statistics data of the pAu, including their height (A) and width (B).

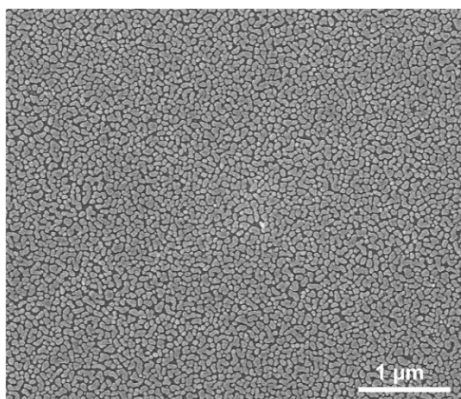

**Figure S3.** SEM image of the pAu substrate after irradiation with NIR laser ( $0.5 \text{ W/cm}^2$ ) for 50 min.

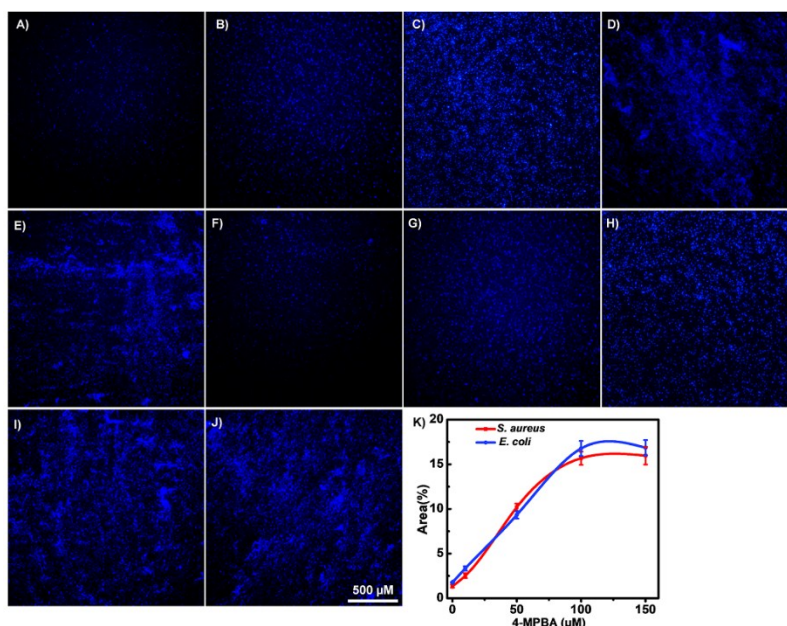

**Figure S4.** The fluorescence images of the chip with various concentrations of 4-MPBA (0: A, F; 10  $\mu\text{M}$ : B, G; 50  $\mu\text{M}$ : C, H; 100  $\mu\text{M}$ : D, I; 150  $\mu\text{M}$ : E, J) after incubation with Hoechst-labeled *S. aureus* (A-E) or *E. coli* (F-J) for 30 min. The bacteria concentration is fixed at  $10^6$  CFU  $\text{mL}^{-1}$ . K) The calculated fluorescence area ratio of the chip under different concentrations of 4-MPBA after incubation with Hoechst-labeled *S. aureus* (red line) or *E. coli* (blue line). To investigate the capture efficiency of the MPBA/pAu chip, the concentration of 4-MPBA was studied. First, the pAu ( $1.0\text{ cm} \times 1.2\text{ cm}$ ) was soaked into the 4-MPBA solutions with different concentrations for 2 h. Then the chip was taken out, washed and put into Hoechst-labeled bacteria solutions ( $10^6$  CFU  $\text{mL}^{-1}$ ) with slow stirring for 30 min to capture bacteria. Next, the chip was gently cleaned and imaged by a fluorescence microscopy. Finally, the fluorescence area ratio in these images were quantitatively calculated by the Image J software. The more bacteria are captured, the larger fluorescence area will be obtained. Thus, the fluorescence area ratio was used to represent the capture efficiency of the chip.

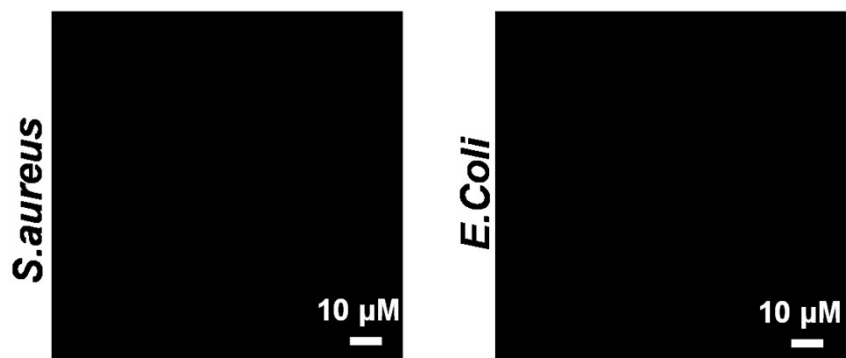

**Figure S5.** CLSM images of Cy5-labeled *S. aureus* and *E. coli* on the glass chips.

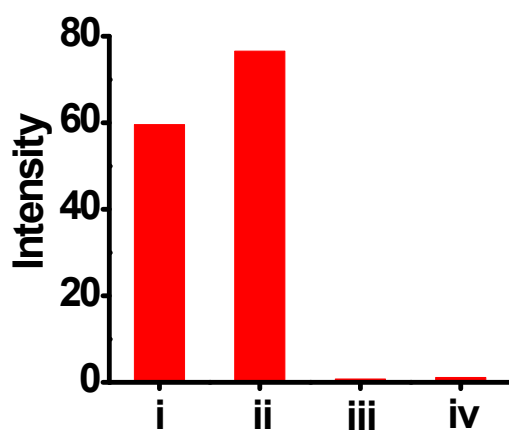

**Figure S6.** Signal quantification of the fluorescence intensity of Cy5-labeled *S. aureus* on the chip ( i ) and glass (iii), and Cy5-labeled *E. coli* on the chip ( ii ) and glass (iv).

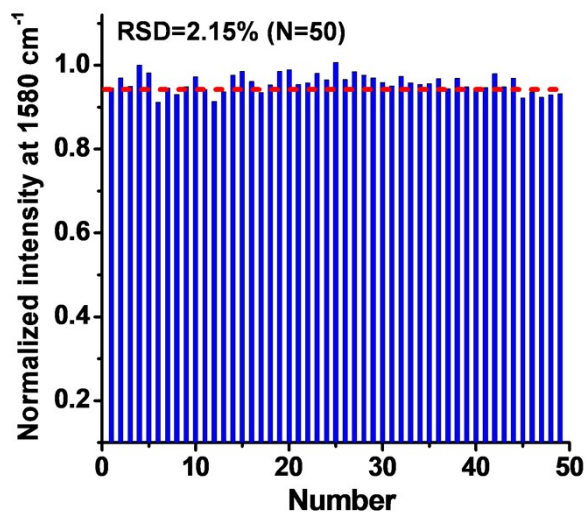

**Figure S7.** The Raman intensity of 4-MPBA at 1580 cm<sup>-1</sup> from 50 random points.

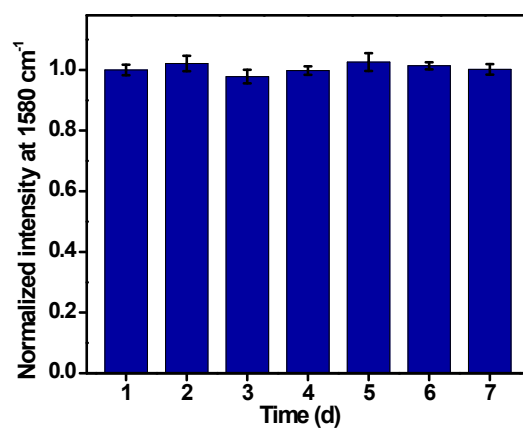

**Figure S8.** The normalized Raman intensity of MPBA/pAu chip at 1580 cm<sup>-1</sup> for a week.

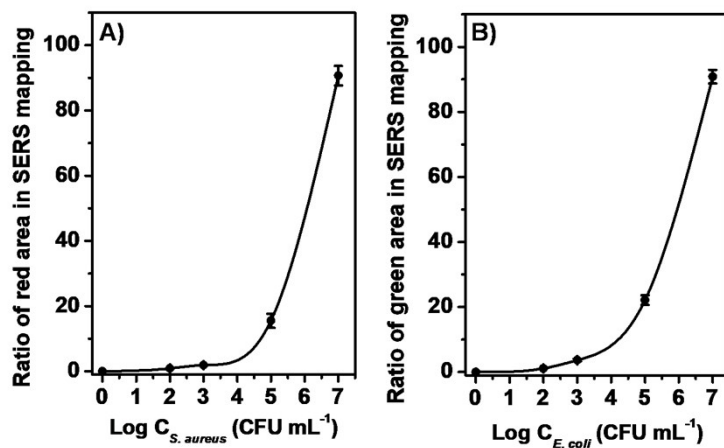

**Figure S9.** Quantitative analysis of the relationship between the logarithmic bacteria concentration of *S.aureus* (A) and *E. coli* (B) and the corresponding ratio of red or green area in Fig. 4D.

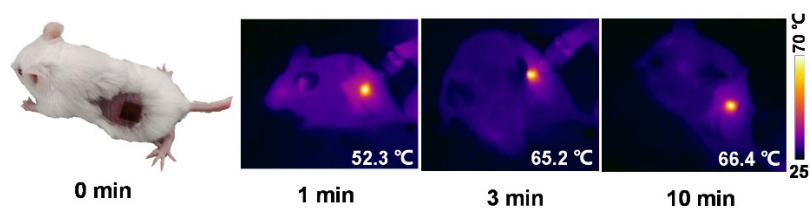

**Figure S10.** Photothermal images for the mouse in the process of NIR treatment.

**Table S1** Comparison of normalized electric-field magnitude and intensity for pAu and the single AuNP.

|      | $\max  \mathbf{E} / \mathbf{E}_0 $ | $\max  \mathbf{E} ^2/ \mathbf{E}_0 ^2$ |
|------|------------------------------------|----------------------------------------|
| pAu  | 19.9                               | 396.01                                 |
| AuNP | 5.73                               | 32.83                                  |

**Table S2** DNA sequences of bacteria-specific aptamers

| Names                       | Sequences (from 5' to 3')                                                                        |
|-----------------------------|--------------------------------------------------------------------------------------------------|
| <i>S. aureus</i><br>aptamer | Cy5-TCCCTACGGCGCTAACCCCCCAGTCCGTCCTCCCAGCCTCACACCG<br>CCACCGTGCTACAAC                            |
| <i>E. coli</i><br>aptamer   | Cy5-GCAATGGTACGGTACTTCCCCATGAGTGTTGTGAAATGTTGGGACA<br>CTAGGTGGCATAGAGCCGCAAAAGTGCACGCTACTTTGCTAA |
